# Supplementary material for: What is the evidence for chronic concussion-related changes in retired athletes: behavioural, pathological and clinical outcomes?
Source: HighWire-hosted journal article supplement (doi:10.1136/bjsports-2013-092248), 2013-03-11
Supplement: bjsports-2013-092248supp.pdf [file bjsports-2013-092248supp.pdf]

Affiliation and disclosure statement for all authors in the BJSM 47:5 April IPHP issue

NB: All panelists received travel funding and accommodation from the Concussion in Sport Group to attend the Consensus meeting in Zurich, Switzerland

| Name                                     | Affiliations                                                                                                                                                                                | Disclosures                                                                                                                                                                                                                                                                                                                                                                                                                                                                                                                                                                                                                                                                                                                                                                                                                                                                                                                                                                                                                                                                                                                                                                                                                                                                                                                                                                                                              |
|------------------------------------------|---------------------------------------------------------------------------------------------------------------------------------------------------------------------------------------------|--------------------------------------------------------------------------------------------------------------------------------------------------------------------------------------------------------------------------------------------------------------------------------------------------------------------------------------------------------------------------------------------------------------------------------------------------------------------------------------------------------------------------------------------------------------------------------------------------------------------------------------------------------------------------------------------------------------------------------------------------------------------------------------------------------------------------------------------------------------------------------------------------------------------------------------------------------------------------------------------------------------------------------------------------------------------------------------------------------------------------------------------------------------------------------------------------------------------------------------------------------------------------------------------------------------------------------------------------------------------------------------------------------------------------|
| <b>CONSENSUS STATEMENT WRITING GROUP</b> |                                                                                                                                                                                             |                                                                                                                                                                                                                                                                                                                                                                                                                                                                                                                                                                                                                                                                                                                                                                                                                                                                                                                                                                                                                                                                                                                                                                                                                                                                                                                                                                                                                          |
| Paul McCrory MBBS PhD                    | Associate Professor, The Florey Institute of Neuroscience and Mental Health, Heidelberg, Australia                                                                                          | Paul McCrory is a co-investigator, collaborator, or consultant on grants relating to mild TBI funded by several governmental organizations. He is Co-Chair of the Australian Centre for Research into Sports Injury and its Prevention (ACRISP), which is one of the International Research Centres for Prevention of Injury and Protection of Athlete Health supported by the International Olympic Committee (IOC). He has a clinical and consulting practice in general and sports neurology. He receives book royalties from McGraw-Hill and was employed in an editorial capacity by the British Medical Journal Publishing Group from 2001-2008. He has been reimbursed by the government, professional scientific bodies, and sporting bodies for presenting research relating to mild TBI and sport-related concussion at meetings, scientific conferences, and symposiums. He received consultancy fees in 2010 from Axon Sports (US) for the development of educational material (which was not renewed) and has received research funding since 2005 from CogState Inc. He is a cofounder and shareholder in two biomedical companies (involved in eHealth and Compression garment technologies) but does not hold any individual shares in any company related to concussion or brain injury assessment or technology. He did not receive any form of financial support directly related to this manuscript. |
| Willem H. Meeuwisse, MD, PhD             | Professor and Co-Chair, Sport Injury Prevention Research Centre, Faculty of Kinesiology and Hotchkiss Brain Institute, Faculty of Medicine, University of Calgary, Calgary, Alberta, Canada | Willem Meeuwisse, MD, PhD has received research grant support through the University of Calgary from the Canadian Institutes of Health Research, Alberta Innovates Health Solutions, the International Football Association (FIFA), Alberta Children’s Hospital Research Institute and the Hotchkiss Brain Institute. He is Co-Chair of the Sport Injury Prevention Research Centre, which is one of the International Research Centres for Prevention of Injury and Protection of Athlete Health supported by the International Olympic Committee (IOC). He has a clinical and consulting practice in sport medicine at the University of Calgary Sport Medicine Centre with a focus on sport related concussion. He has received travel funding from FIFA and the Medical Commission of the IOC. From 1998-2012 he was the Editor-in-Chief of the Clinical Journal of Sport Medicine and received editorial support funding from Lippincott-Wolters Kluwer. He receives compensation as a medical consultant to the National Hockey League, may receive royalty from BKIN Technologies, and is a shareholder of Safebrain Canada and PrivIT Healthcare. He did not                                                                                                                                                                                                                                                     |

Affiliation and disclosure statement for all authors in the BJSM 47:5 April IPHP issue

NB: All panelists received travel funding and accommodation from the Concussion in Sport Group to attend the Consensus meeting in Zurich, Switzerland

| Name                          | Affiliations                                                                                                                                                                                 | Disclosures                                                                                                                                                                                                                                                                                                                                                                                                                                                                                                                                                                                                            |
|-------------------------------|----------------------------------------------------------------------------------------------------------------------------------------------------------------------------------------------|------------------------------------------------------------------------------------------------------------------------------------------------------------------------------------------------------------------------------------------------------------------------------------------------------------------------------------------------------------------------------------------------------------------------------------------------------------------------------------------------------------------------------------------------------------------------------------------------------------------------|
|                               |                                                                                                                                                                                              | receive any form of financial support directly related to this manuscript.                                                                                                                                                                                                                                                                                                                                                                                                                                                                                                                                             |
| Mark Aubry MD, Dip.Sport Med. | Chief Medical Officer International Ice Hockey Federation, Switzerland; Member of the IOC Medical Commission Games Group , Co-Director Ottawa Sport Medicine Centre, Ottawa, Ontario, Canada | Mark Aubry M.D.Dip Sport Med. receives travel funding from the IIHF and IOC Medical Commission Games Group for meetings, IIHF Championships and Olympic Games. He did not receive any form of financial support directly related to this manuscript.                                                                                                                                                                                                                                                                                                                                                                   |
| Robert C. Cantu, M.A., M.D.   | Clinical Professor, Neurosurgery and Co-Director Center for the Study of Traumatic Encephalopathy, Boston University Medical Center, Boston, MA USA                                          | Robert C. Cantu, M.A., M.D serves as Vice President, National Operating Committee on Standards for Athletic Equipment (NOCSAE), Co-Founder and Chairman Medical Director Sports Legacy (SLI), Waltham, MA, USA; Senior Advisor to NFL’s Head, Neck and Spine Committee, Expert witness Trial Testimony. He did not receive any form of financial support directly related to this manuscript.                                                                                                                                                                                                                          |
| Jiří Dvořák, MD, PhD          | Professor of Neurology at the University of Zurich, Senior consultant Schulthess Clinic Zurich, Switzerland, Chairman F-MARC (FIFA Medical Assessment and Research Center)                   | Jiri Dvorak, MD, PhD, received compensation from his work at FIFA as FIFA Chief medical officer, no other compensations or grants have been received. He did not receive any form of financial support directly related to this manuscript.                                                                                                                                                                                                                                                                                                                                                                            |
| Ruben J. Echemendia, Ph.D     | Psychological and Neurobehavioral Associates, Inc., State College, PA, USA, Adjunct Associate Professor of Psychology, University of Missouri – Kansas City, USA                             | Ruben J. Echemendia, Ph.D. receives financial compensation as a consultant to the National Hockey League, Major League Soccer, and the U.S. Soccer Federation. He also receives financial compensation as a consultant to Princeton University and has served as a PI or co-PI on grants funded by NOCSAE, AMSSM, and the New Jersey Commission on Brain Injury Research. Dr. Echemendia maintains a private practice focused on clinical neuropsychology, sports neuropsychology, and forensic applications of neuropsychology. He did not receive any form of financial support directly related to this manuscript. |
| Lars Engebretsen MD PhD       | Professor, Department of Orthopaedic Surgery, Oslo University Hospital and                                                                                                                   | Lars Engebretsen, MD, PhD has received research grant support through the University of Oslo from the Norwegian Institutes of Health Research, The Health South East, the                                                                                                                                                                                                                                                                                                                                                                                                                                              |

Affiliation and disclosure statement for all authors in the BJSM 47:5 April IPHP issue

NB: All panelists received travel funding and accommodation from the Concussion in Sport Group to attend the Consensus meeting in Zurich, Switzerland

| Name                        | Affiliations                                                                                                                                                                                   | Disclosures                                                                                                                                                                                                                                                                                                                                                                                                                                                                                                                                                                                                                                                                                                                                                                                                              |
|-----------------------------|------------------------------------------------------------------------------------------------------------------------------------------------------------------------------------------------|--------------------------------------------------------------------------------------------------------------------------------------------------------------------------------------------------------------------------------------------------------------------------------------------------------------------------------------------------------------------------------------------------------------------------------------------------------------------------------------------------------------------------------------------------------------------------------------------------------------------------------------------------------------------------------------------------------------------------------------------------------------------------------------------------------------------------|
|                             | Faculty of Medicine, University of Oslo, Norway. Co-chair Oslo Sports Trauma Research Center, Oslo, Norway. Head Scientific Activities, International Olympic Committee, Lausanne, Switzerland | International Football Association (FIFA), He is Co-Chair of the Sport Injury Prevention Research Centre, which is one of the International Research Centres for Prevention of Injury and Protection of Athlete Health supported by the International Olympic Committee (IOC). He is the professor and Chair of the Oslo University Orthopaedic department. He has been Editor-in-Chief of the BJSM IPHP From 2008. From January 2012 he has been co-editor of The Journal of Bone and Joints. He did not receive any form of financial support directly related to this manuscript.                                                                                                                                                                                                                                     |
| Karen M. Johnston, MD, Ph.D | Neurosurgeon, Division of Neurosurgery, University of Toronto; Concussion Management Program Athletic Edge Sports Medicine, Toronto, Canada                                                    | Karen M. Johnston MD, Ph.D is a neurosurgeon subspecialized in brain trauma and has a clinical and research focus in sport concussion. She has received research funding through the CIHR, ONF and Innovation Fund, American College of Surgeons, McGill University, Pashby Sport Safety Fund and Think First Canada. She has independently consulted widely with many sport organizations however she has not and has never had a formal reimbursed affiliation with any sport team or sport governing body. She did not receive any form of financial support directly related to this manuscript.                                                                                                                                                                                                                     |
| Jeffrey S. Kutcher, MD      | Associate Professor and Director, Michigan NeuroSport, Departement of Neurology, University of Michigan, Ann Arbor, MI, USA                                                                    | Jeffrey S. Kutcher, MD is the Director of Michigan NeuroSport, the University of Michigan's academic sports neurology program. He has received research grant support form the National Collegiate Athletic Association and EIMindA, Ltd. He is the Director of the National Basketball Association's Concussion Program and is a paid consultant for the National Hockey League Players' Association. He is a current member of the National Football League Players' Association's Mackey-White TBI Committee. He is also a consulting neurologist for the United States Ski and Snowboard Association. He was a founding member and the first Chairperson of the Sports Neurology Section of the American Academy of Neurology. He did not receive any form of financial support directly related to this manuscript. |
| Martin Raftery MB BS FACSP  | Chief Medical Officer, International Rugby Board, Dublin, Ireland                                                                                                                              | No disclosures                                                                                                                                                                                                                                                                                                                                                                                                                                                                                                                                                                                                                                                                                                                                                                                                           |
| Allen Sills, MD, FACS       | Associate Professor of Neurosurgery, Orthopaedic Surgery and                                                                                                                                   | Allen Sills, MD, FACS serves on the medical board of the Federation Equestre Internationale (FEI) and has received travel funding from that organization. He                                                                                                                                                                                                                                                                                                                                                                                                                                                                                                                                                                                                                                                             |

Affiliation and disclosure statement for all authors in the BJSM 47:5 April IPHP issue

NB: All panelists received travel funding and accommodation from the Concussion in Sport Group to attend the Consensus meeting in Zurich, Switzerland

| Name                                                                                                              | Affiliations                                                                                                                                                                                                                                                     | Disclosures                                                                                                                                                                                                                                                                                                                                                                                                                                                                                                                                                                                                                                                                                                                                                                                                                         |
|-------------------------------------------------------------------------------------------------------------------|------------------------------------------------------------------------------------------------------------------------------------------------------------------------------------------------------------------------------------------------------------------|-------------------------------------------------------------------------------------------------------------------------------------------------------------------------------------------------------------------------------------------------------------------------------------------------------------------------------------------------------------------------------------------------------------------------------------------------------------------------------------------------------------------------------------------------------------------------------------------------------------------------------------------------------------------------------------------------------------------------------------------------------------------------------------------------------------------------------------|
|                                                                                                                   | Rehabilitation; Vanderbilt Sports Concussion Center, Vanderbilt University Medical Center, Nashville, Tennessee, USA                                                                                                                                             | also serves as unpaid neurosurgical consultant to the US Equestrian Foundation, the Southeastern Conference (SEC) Working Group on Concussion, and the Nashville Predators (NHL) hockey team. He has a clinical practice in neurosurgery at the Vanderbilt University Medical Center with a focus on neurological problems in athletes. He did not receive any form of financial support directly related to this manuscript.                                                                                                                                                                                                                                                                                                                                                                                                       |
| <b>CONSENSUS STATEMENT COAUTHORS</b>                                                                              |                                                                                                                                                                                                                                                                  |                                                                                                                                                                                                                                                                                                                                                                                                                                                                                                                                                                                                                                                                                                                                                                                                                                     |
| Brian W. Benson, MD, PhD                                                                                          | Adjunct Research Assistant Professor, Department of Clinical Neurosciences, Faculty of Medicine; Clinical Assistant Professor, Department of Family Medicine; and Sport Medicine Centre, Faculty of Kinesiology, University of Calgary, Calgary, Alberta, Canada | Brian W. Benson, MD, PhD has a clinical and consulting practice in sport medicine at the University of Calgary Sport Medicine Centre with a focus on sport-related concussion. He also serves as Director of the Sport Concussion Clinic at the University of Calgary Sport Medicine Centre and may receive royalty from BKIN Technologies. He did not receive any form of financial support directly related to this manuscript.                                                                                                                                                                                                                                                                                                                                                                                                   |
| Gavin A. Davis, MB.BS                                                                                             | Department of Neurosurgery, Austin and Cabrini Hospitals & The Florey Institute of Neuroscience and Mental Health, Melbourne, Victoria, Australia                                                                                                                | Gavin A. Davis, MB.BS. has received travel funding from FIFA. He did not receive any form of financial support directly related to this manuscript                                                                                                                                                                                                                                                                                                                                                                                                                                                                                                                                                                                                                                                                                  |
| Kevin M. Guskiewicz, PhD, ATC  | Kenan Distinguished Professor and Chair, Department of Exercise and Sport Science; Co-Director, Matthew Gfeller Sport-Related Traumatic Brain Injury Research Center, University of North Carolina at Chapel Hill, Chapel Hill, NC; USA                          | Kevin Guskiewicz, PhD, ATC, serves on the NCAA's Health and Safety Advisory Committee for Concussion, the NFL's Head Neck and Spine Committee, and the NFLPA's Mackey-White Committee; has received funding for travel and honoraria for lectures on sports concussion for professional organizations, including the IOC and FIFA; has given expert testimony on traumatic brain injury/concussion cases; and has received research funding from the National Institutes of Health, Centers for Disease Control and Prevention, National Operating Committee for Standards in Athletic Equipment, National Collegiate Athletic Association, NFL Charities, NFL Players' Association, USA Hockey, and National Athletic Trainers' Association. He did not receive any form of financial support directly related to this manuscript. |

Affiliation and disclosure statement for all authors in the BJSM 47:5 April IPHP issue

NB: All panelists received travel funding and accommodation from the Concussion in Sport Group to attend the Consensus meeting in Zurich, Switzerland

| Name                                  | Affiliations                                                                                                                                                                                                                                                                                                                                                                                                 | Disclosures                                                                                                                                                                                                                                                                                                                                                                                                                                                                                                                                                                                                                                                                                                                                                     |
|---------------------------------------|--------------------------------------------------------------------------------------------------------------------------------------------------------------------------------------------------------------------------------------------------------------------------------------------------------------------------------------------------------------------------------------------------------------|-----------------------------------------------------------------------------------------------------------------------------------------------------------------------------------------------------------------------------------------------------------------------------------------------------------------------------------------------------------------------------------------------------------------------------------------------------------------------------------------------------------------------------------------------------------------------------------------------------------------------------------------------------------------------------------------------------------------------------------------------------------------|
| Stanley A. Herring, MD                | Clinical Professor Departments of Rehabilitation Medicine, Orthopaedics and Sports Medicine and Neurological Surgery, University of Washington; Co-Medical Director Seattle Sports Concussion Program, Team Physician Seattle Seahawks and Seattle Mariners, Seattle, Washington, USA                                                                                                                        | Stanley A. Herring, MD serves as a Member National Football League Head, Neck and Spine Committee; Member Football and Wellness Committee USA Football; Member Medical Advisory Board Pop Warner Football; Chair of Medical Advisory Board X2IMPACT, a non-financial position. Clinical and consulting practice at Harborview Medical Center focusing on the diagnosis and management of neurological and musculoskeletal injuries with particular interest in spinal disorders in active people and athletes and sports-related concussions. No form of financial support directly related to this manuscript was received                                                                                                                                     |
| Grant Iverson PhD                     | Neuropsychology Outcome Assessment Laboratory; Professor, Department of Psychiatry, University of British Columbia, Vancouver, BC, Canada                                                                                                                                                                                                                                                                    | Grant Iverson, Ph.D. has been reimbursed by the government, professional scientific bodies, and commercial organizations for discussing or presenting research relating to mild TBI and sport-related concussion at meetings, scientific conferences, and symposiums. He has a clinical and consulting practice in forensic neuropsychology involving individuals who have sustained mild TBIs (including professional athletes). He has received research funding from several test publishing companies, including ImPACT Applications, Inc., CNS Vital Signs, and Psychological Assessment Resources (PAR, Inc.). He did not receive any form of financial support directly related to this manuscript.                                                      |
| Barry D. Jordan MD, MPH               | Associate Professor of Clinical Neurology at Weill Medical College of Cornell University. New York, New York USA. Assistant Medical Director of the Burke Rehabilitation Hospital, White Plains, New York. USA. Chief Medical Officer of the New York State Athletic Commission. New York, New York USA. National Football League Players Association (NFLPA) Mackey-White Traumatic Brain Injury Committee. | Dr. Jordan has received financial compensation from the National Football League (NFL) Benefits Association for the establishment of a Neurocognitive Disability Benefit for retired players. He also has received financial compensation from Innovative CEUs for developing a medical-based high school coaching education program. In his position as the Chief Medical Officer of the New York State Athletic Commission, Dr. Jordan is a governor's appointed public officer of the State of New York. He maintains an inpatient and outpatient clinical practice at the Burke Rehabilitation Hospital specializing in traumatic brain injury, dementia and sports neurology. Dr. Jordan did not receive any financial support related to this manuscript. |
| James Kissick MD, CCFP, Dip Sport Med | Sport Medicine Physician, Ottawa Sport Medicine Centre, Ottawa, Canada; Clinical                                                                                                                                                                                                                                                                                                                             | James Kissick has a clinical and consulting practice in sport and exercise medicine at the Ottawa Sport Medicine Centre. He did not receive any form of financial support directly                                                                                                                                                                                                                                                                                                                                                                                                                                                                                                                                                                              |

Affiliation and disclosure statement for all authors in the BJSM 47:5 April IPHP issue

NB: All panelists received travel funding and accommodation from the Concussion in Sport Group to attend the Consensus meeting in Zurich, Switzerland

| Name                                           | Affiliations                                                                                                                                                                                                                                                                                                                                             | Disclosures                                                                                                                                                                                                                                                                                                                                                                                                                                                                                                                                                                                                                                                                                                                                                                                                                                                                                                                                                                                                                                                                                                                                                                                                                         |
|------------------------------------------------|----------------------------------------------------------------------------------------------------------------------------------------------------------------------------------------------------------------------------------------------------------------------------------------------------------------------------------------------------------|-------------------------------------------------------------------------------------------------------------------------------------------------------------------------------------------------------------------------------------------------------------------------------------------------------------------------------------------------------------------------------------------------------------------------------------------------------------------------------------------------------------------------------------------------------------------------------------------------------------------------------------------------------------------------------------------------------------------------------------------------------------------------------------------------------------------------------------------------------------------------------------------------------------------------------------------------------------------------------------------------------------------------------------------------------------------------------------------------------------------------------------------------------------------------------------------------------------------------------------|
|                                                | Lecturer, Dept of Family Medicine, University of Ottawa, Ottawa, Canada. Team Physician, Canadian National Men's Sledge Hockey Team.                                                                                                                                                                                                                     | related to this manuscript.                                                                                                                                                                                                                                                                                                                                                                                                                                                                                                                                                                                                                                                                                                                                                                                                                                                                                                                                                                                                                                                                                                                                                                                                         |
| Michael McCrea, PhD, ABPP                      | Professor & Director of Brain Injury Research, Departments of Neurosurgery and Neurology, Medical College of Wisconsin, WI, USA                                                                                                                                                                                                                          | Michael McCrea, PhD has been funded by the United States Department of Defense, U.S. Defense Veterans Brain Injury Center (DVBIC), NFL Charities, National Collegiate Athletic Association (NCAA), National Operating Committee on Standards for Athletic Equipment (NOCSAE), National Federation of High School Associations (NFHS), and other funding organizations over the past decade. Dr. McCrea is a member of the NFL Head, Neck and Spine Committee and has served on several U.S. national panels for scientific review and policy making relevant to sport-related concussion. He has been funded by BrainScope, Inc. for prior studies, but receives no direct compensation from BrainScope or other industry entities or sports organizations. Dr. McCrea is co-author of the Standardized Assessment of Concussion (SAC). He receives no financial compensation or support from publication or distribution of the SAC. He is currently principal investigator (PI) on a study by the U.S. Department of Defense comparing several computerized neurocognitive assessment tools for the assessment of sport-related concussion. He did not receive any form of financial support directly related to this manuscript. |
| Andrew S McIntosh, BAppSci (PT), MBiomedE, PhD | Adjunct Associate Professor Australian Centre for Research into Injury in Sports and its Prevention, Monash Injury Research Institute, Monash University, Adjunct Associate Professor, Transport and Road Safety Research, Faculty of Science, the University of New South Wales, Director, McIntosh Consultancy and Research Pty Ltd. Sydney, Australia | Andrew McIntosh in a self-employed consultant. In the area of sport and sports injury research he has received grant support through UNSW from the Australian Research Council, NSW Racing, the IRB, the ARU, and the AFL. As a consultant in the area of sport and sports injury he has undertaken paid work for the Australian Racing Board, McLaren F1, the IRB and Albion. He has received travel funding from the International Rugby Board, IIHF, FIFA and the Medical Commission of the IOC. He did not receive any form of financial support directly related to this manuscript.                                                                                                                                                                                                                                                                                                                                                                                                                                                                                                                                                                                                                                           |
| David L. Maddocks, LLB, PhD                    | Barrister & Solicitor, Perry Maddocks Trollope Lawyers, Melbourne, Australia.                                                                                                                                                                                                                                                                            | David Maddocks, LLB, PhD has received research grant support through the Australian Football League (AFL). He provides consultancy medico-legal advice to the AFL. He has                                                                                                                                                                                                                                                                                                                                                                                                                                                                                                                                                                                                                                                                                                                                                                                                                                                                                                                                                                                                                                                           |

Affiliation and disclosure statement for all authors in the BJSM 47:5 April IPHP issue

NB: All panelists received travel funding and accommodation from the Concussion in Sport Group to attend the Consensus meeting in Zurich, Switzerland

| Name                        | Affiliations                                                                                                                                                                                                                                                                                          | Disclosures                                                                                                                                                                                                                                                                                                                                                                                                                                                                                                                                                                                                                                                                                                                                                                                                                                                                                    |
|-----------------------------|-------------------------------------------------------------------------------------------------------------------------------------------------------------------------------------------------------------------------------------------------------------------------------------------------------|------------------------------------------------------------------------------------------------------------------------------------------------------------------------------------------------------------------------------------------------------------------------------------------------------------------------------------------------------------------------------------------------------------------------------------------------------------------------------------------------------------------------------------------------------------------------------------------------------------------------------------------------------------------------------------------------------------------------------------------------------------------------------------------------------------------------------------------------------------------------------------------------|
|                             | Neuropsychologist in private practice.                                                                                                                                                                                                                                                                | received travel funding from FIFA. He did not receive any form of financial support directly related to this manuscript.                                                                                                                                                                                                                                                                                                                                                                                                                                                                                                                                                                                                                                                                                                                                                                       |
| Michael Makdissi, MBBS, PhD | Research Fellow, The Florey Institute of Neuroscience and Mental Health, Melbourne Brain Centre, Austin Campus, Melbourne, Australia. Research Fellow, Centre For Health Exercise and Sports Medicine, Melbourne Physiotherapy Department, University of Melbourne, Melbourne, Australia              | Michael Makdissi, MBBS, PhD, has received research grant support through The Florey Institute of Neurosciences and Mental Health from the National Health and Medical Research Council, the Australian Football League (AFL) and AFL Medical Officers Association. He has received travel funding from FIFA. He has a clinical and consulting practice in sports medicine. He did not receive any form of financial support directly related to this manuscript.                                                                                                                                                                                                                                                                                                                                                                                                                               |
| Laura Purcell, MD, FRCPC    | Associate Clinical Professor, Department of Pediatrics, McMaster University, Hamilton ON, Canada; Pediatric Sport Medicine Physician, David Braley Sport Medicine and Rehabilitation Centre, McMaster University, Hamilton ON, Canada; President, Paediatric Sport and Exercise Medicine Section, CPS | No disclosures                                                                                                                                                                                                                                                                                                                                                                                                                                                                                                                                                                                                                                                                                                                                                                                                                                                                                 |
| Margot Putukian, MD         | Director of Athletic Medicine, Head Team Physician, Princeton University, Associate Clinical Professor, Robert Wood Johnson, University of Medicine and Dentistry of New Jersey (UMDNJ), USA                                                                                                          | Margot Putukian MD has received research grant support through the new Jersey Commission on Brain Injury, the American Medical Society for Sports Medicine (AMSSM) and the National Operating Committee on Standards for Athletic Equipment (NOCSAE). She is the chair of the US Lacrosse Sports Science & Safety Committee and also serves on the National Football League (NFL) Head Neck and Spine Committee, chairing the Return to Play subcommittee for the NFL. She works as a team physician for Princeton University, as well as team physician for the US Men's National Lacrosse Team and for US Soccer. She is a consultant on concussion for the Center for Disease Controls (CDC) and the National Collegiate Athletic Association (NCAA). She is a past president for the AMSSM and currently is president of the AMSSM Foundation. Dr. Putukian does not receive any financial |

Affiliation and disclosure statement for all authors in the BJSM 47:5 April IPHP issue

NB: All panelists received travel funding and accommodation from the Concussion in Sport Group to attend the Consensus meeting in Zurich, Switzerland

| Name                        | Affiliations                                                                                                                                                                                                       | Disclosures                                                                                                                                                                                                                                                                                                                                                                                                                                                                                                                                                                                                                     |
|-----------------------------|--------------------------------------------------------------------------------------------------------------------------------------------------------------------------------------------------------------------|---------------------------------------------------------------------------------------------------------------------------------------------------------------------------------------------------------------------------------------------------------------------------------------------------------------------------------------------------------------------------------------------------------------------------------------------------------------------------------------------------------------------------------------------------------------------------------------------------------------------------------|
|                             |                                                                                                                                                                                                                    | compensation for her work with the AMSSM, NFL, US Lacrosse, CDC or NCAA. She did not receive any form of financial support directly related to this manuscript.                                                                                                                                                                                                                                                                                                                                                                                                                                                                 |
| Kathryn Schneider, PT, PhD  | Sport Injury Prevention Research Centre, University of Calgary, Calgary, Alberta, Canada                                                                                                                           | Kathryn Schneider, PT, PhD has received research grant support through the University of Calgary from the Alberta Centre for Child, Family and Community Research. She has a clinical and consulting practice in physiotherapy at Evidence Sport and Spinal and Centric Health with a focus on sport related concussion. She did not receive any form of financial support directly related to this manuscript.                                                                                                                                                                                                                 |
| Charles H. Tator, MD, PHD   | Professor of Neurosurgery, Toronto Western Hospital and University of Toronto, Canada; Senior Scientist, Krembil Neuroscience Centre, Toronto, Canada; Founder, ThinkFirst Canada; Board Member, Parachute Canada. | Charles Tator is a consultant to ImpaKt Protective, and is co-chair of the Concussion Awareness and Recognition Committee of the Ontario Neurotrauma Foundation. He is Chair of ThinkFirst’s Concussion Education and Awareness Committee, and Project Director of the Canadian Sports Concussion Project at the Krembil Neuroscience Centre. He is Director of the Ontario Concussion Centres Consortium. He has received research grants from many public sources including the Canadian Institute for Health Research, and the Ontario Brain Institute. He did not receive any financial support related to this manuscript. |
| Michael Turner MB BS        | Chief Medical Adviser, British Horseracing Authority, London, United Kingdom                                                                                                                                       | Michael Turner is employed as Chief Medical Adviser by the British Horseracing Authority and the Lawn Tennis Association. He has received travel funding from FIFA, the IOC, the ACSM and Gruppoforte (Physiomind) for attending conferences and lecturing. In addition to travel funding, most conference organisers also provided free Registration and support for accommodation. He did not receive any form of financial support directly related to this manuscript.                                                                                                                                                      |
| <b>OTHER REVIEW AUTHORS</b> |                                                                                                                                                                                                                    |                                                                                                                                                                                                                                                                                                                                                                                                                                                                                                                                                                                                                                 |
| Mick Molloy MD              | Department of Medicine, University College, Cork, Ireland                                                                                                                                                          | No disclosures                                                                                                                                                                                                                                                                                                                                                                                                                                                                                                                                                                                                                  |
| Johna Register-Mihalik PhD  | Senior Research Associate, Emergency Services Institute, WakeMed Health and Hospitals, Raleigh, NC; USA; Adjunct                                                                                                   | Johna Register-Mihalik, PhD, LAT, ATC serves on the Board of Directors for the Brain Injury Association of North Carolina; has received funding for travel and honoraria for lectures on concussion in sport for professional organizations and has received funding from the                                                                                                                                                                                                                                                                                                                                                   |



Affiliation and disclosure statement for all authors in the BJSM 47:5 April IPHP issue

NB: All panelists received travel funding and accommodation from the Concussion in Sport Group to attend the Consensus meeting in Zurich, Switzerland

| Name                     | Affiliations                                                                                                                                                                            | Disclosures                                                                                                                                                                                                                                                                                                                                                                                                                                                                                                                                                                                                                                                                                                       |
|--------------------------|-----------------------------------------------------------------------------------------------------------------------------------------------------------------------------------------|-------------------------------------------------------------------------------------------------------------------------------------------------------------------------------------------------------------------------------------------------------------------------------------------------------------------------------------------------------------------------------------------------------------------------------------------------------------------------------------------------------------------------------------------------------------------------------------------------------------------------------------------------------------------------------------------------------------------|
|                          | Assistant Professor, Department of Exercise and Sport Science, University of North Carolina at Chapel Hill, Chapel Hill, NC; USA                                                        | National Operating Committee for Standards in Athletic Equipment, National Football League Charities, and center grant funding from the National Institutes of Health (North Carolina Translational and Clinical Science Institute). She did not receive any form of financial support directly related to this manuscript.                                                                                                                                                                                                                                                                                                                                                                                       |
| Stephen A Macciocchi PhD | Shepherd Center, Atlanta, Georgia, USA                                                                                                                                                  | No disclosures                                                                                                                                                                                                                                                                                                                                                                                                                                                                                                                                                                                                                                                                                                    |
| Gerard A Gioia PhD       | Children’s National Medical Center & George Washington University School of Medicine, Rockville, Maryland, USA                                                                          | Gerard A. Gioia, Ph.D. has received research grant support through the CDC and NIH as well as the USA Hockey Foundation. He serves as a consultant to multiple school systems in the Baltimore-Washington region. Dr. Gioia maintains a clinical practice focused on clinical neuropsychology and sports neuropsychology. He receives royalties as a co-author of the Behavior Rating Inventory of Executive Function (BRIEF) and Tasks of Executive Control (TEC). He is a co-author of the Pediatric ImPACT test battery, funded through the CDC, and has not received direct financial compensation for its development. He did not receive any form of financial support directly related to this manuscript. |
| Paul Comper PhD          | Kinesiology and Physical Education & Graduate Department of Rehabilitation Science, University of Toronto, Ontario, Canada                                                              | PC receives financial compensation as a consultant to the National Hockey League Players’ Association. He did not receive any form of financial support directly related to this manuscript.                                                                                                                                                                                                                                                                                                                                                                                                                                                                                                                      |
| Steven P. Broglio PhD    | Michigan NeuroSport, School of Kinesiology, University of Michigan, MI, USA                                                                                                             | Dr Broglio is a member of Michigan NeuroSport and currently has research support from EIMinda, Ltd, the National Athletic Trainers’ Association – Research and Education Foundation, the National Institutes of Health – National Institute of Neurological Disorders and Stroke, National Collegiate Athletic Association, and the Women’s Sports, Health and Activity Research and Policy (SHARP) Center. These funds were not used to support this manuscript.                                                                                                                                                                                                                                                 |
| Alain Ptito PhD          | Department of Psychology, McGill University Health Centre, Cognitive Neuroscience Unit, Montreal Neurological Institute and Hospital & Department of Neurology and Neurosurgery, McGill | Alain Ptito is Director of the Department of Psychology at the MUHC and Professor of Neurology and Neurosurgery at McGill University. He has received research grants from several public sources including the Canadian Institute for Health Research, and the Ontario Neurotrauma Foundation. He is also a consultant neuropsychologist specializing in traumatic brain injury/concussion in athletes and motor vehicle accident victims. He did                                                                                                                                                                                                                                                                |

Affiliation and disclosure statement for all authors in the BJSM 47:5 April IPHP issue

NB: All panelists received travel funding and accommodation from the Concussion in Sport Group to attend the Consensus meeting in Zurich, Switzerland

| Name                            | Affiliations                                                                                                                                                                               | Disclosures                                                                                                                                                                                                                                                                                                                                                               |
|---------------------------------|--------------------------------------------------------------------------------------------------------------------------------------------------------------------------------------------|---------------------------------------------------------------------------------------------------------------------------------------------------------------------------------------------------------------------------------------------------------------------------------------------------------------------------------------------------------------------------|
|                                 | University, Montreal, Canada.                                                                                                                                                              | not receive any financial support related to this manuscript.                                                                                                                                                                                                                                                                                                             |
| Carolyn A Emery PhD             | Faculty of Kinesiology, Sport Injury Prevention Research Centre, University of Calgary, Calgary, Alberta, Canada                                                                           | CAE is supported by a Population Health Investigator Award from the Alberta Innovates Health Solutions. She also holds a Professorship in Pediatric Rehabilitation funded through the Alberta Children’s Hospital Foundation. She co-chairs the Sport Injury Prevention research Centre at the University of Calgary funded by the International Olympic Committee (IOC). |
| Jon Patricios MD                | Sports Concussion South Africa, Johannesburg, South Africa<br><br>The Section of Sports Medicine, Faculty of Health Sciences, University of Pretoria, Pretoria, South Africa               | Dr Jon Patricios received funding from the South African Rugby Union through its BokSmart injury prevention programme to attend the Concussion in Sport Consensus meeting.                                                                                                                                                                                                |
| Christine Providenza PhD        | Parachute (Formerly Safe Communities Canada, Safe Kids Canada, SMARTRISK, and ThinkFirst Canada), Toronto, Ontario, Canada                                                                 | No disclosures                                                                                                                                                                                                                                                                                                                                                            |
| Andrew Gardner PsyD             | Centre for Translational Neuroscience and Mental Health, School of Medicine & Public Health, University of Newcastle, NSW, Australia.                                                      | No disclosures                                                                                                                                                                                                                                                                                                                                                            |
| Richard G. Ellenbogen, MD, FACS | Professor and Chairman Theodore S. Roberts Endowed Chair Department of Neurological Surgery University of Washington Seattle, WA, USA Co-Chair, NFL Head, Neck and Spine Medical Committee | None (National Football League, Volunteer Consultant to Commissioner . No financial remunerations received.)                                                                                                                                                                                                                                                              |
